# Supplementary material for: Loneliness and type 2 diabetes incidence: findings from the English Longitudinal Study of Ageing
Source: PubMed Central journal article supplement (PMC7527325; doi:10.1007/s00125-020-05258-6), 2020-09-15
Supplement: 125_2020_5258_MOESM1_ESM.pdf [file 125_2020_5258_MOESM1_ESM.pdf]

**ESM Table 1: Cox proportional hazards regression of loneliness (2004–05) on diabetes incidence (2006–17) with interaction terms**

|                                            | HR; 95% CI<br>(n = 4112) |
|--------------------------------------------|--------------------------|
| <b>Loneliness</b>                          | 1.45;1.02-2.07*          |
| <b>Age</b>                                 | 1.02;0.98-1.06           |
| <b>Sex (ref: men)</b>                      | 0.54;0.26-1.10           |
| <b>Wealth (ref: quintile 1)</b>            | 1                        |
| <b>2</b>                                   | 0.78;0.51-1.21           |
| <b>3</b>                                   | 0.93;0.64-1.35           |
| <b>4</b>                                   | 0.81;0.55-1.20           |
| <b>5</b>                                   | 0.54;0.35-0.82**         |
| <b>Ethnicity (ref: white)</b>              | 1.57;0.15-16.55          |
| <b>Smoking (ref: non-smoker)</b>           | 0.94;0.66-1.33           |
| <b>Physical activity (ref: light/none)</b> | 1                        |
| <b>Moderate</b>                            | 0.81;0.55-1.18           |
| <b>Vigorous</b>                            | 0.87;0.62-1.22           |
| <b>Alcohol (ref ≥ 5 days/week)</b>         | 0.94;0.68-1.30           |
| <b>BMI</b>                                 | 1.09;1.06-1.12***        |
| <b>Hypertension case (ref: no)</b>         | 1.39;1.07-1.80*          |
| <b>CVD case (ref: no)</b>                  | 1.03;0.73-1.45           |
| <b>HbA<sub>1c</sub></b>                    | 14.46;9.74-21.47***      |
| <b>Loneliness*age</b>                      | 0.98;0.96-1.01           |
| <b>Loneliness*sex</b>                      | 0.97;0.60-1.55           |
| <b>Loneliness*ethnicity</b>                | 1.40;0.37-5.36           |

BMI= Body mass index; CI= Confidence Interval; CVD= Cardiovascular disease;

HbA<sub>1c</sub> = Glycated haemoglobin; HR= Hazard Ratio; Ref = reference category

\* $p < 0.05$  \*\* $p < 0.01$  \*\*\* $p < 0.001$

**ESM Table 2: Cox proportional hazards regression of loneliness (2004–05) on diabetes incidence (2006–17) with loneliness and depression entered as continuous scores**

|                                            | <b>HR; 95% CI<br/>(n = 4104)</b> |
|--------------------------------------------|----------------------------------|
| <b>Loneliness (range 3-9)</b>              | 1.11;1.01-1.21*                  |
| <b>Age</b>                                 | 1.00;0.98-1.01                   |
| <b>Sex (ref: men)</b>                      | 0.50;0.39-0.65***                |
| <b>Wealth (ref: quintile 1)</b>            | 1                                |
| <b>2</b>                                   | 0.73;0.47-1.13                   |
| <b>3</b>                                   | 0.87;0.60-1.26                   |
| <b>4</b>                                   | 0.86;0.60-1.26                   |
| <b>5</b>                                   | 0.53;0.35-0.80**                 |
| <b>Ethnicity (ref: white)</b>              | 2.63;1.16-5.97*                  |
| <b>Smoking (ref: non-smoker)</b>           | 0.90;0.64-1.28                   |
| <b>Physical activity (ref: light/none)</b> | 1                                |
| <b>Moderate</b>                            | 0.88;0.60-1.28                   |
| <b>Vigorous</b>                            | 0.91;0.65-1.27                   |
| <b>Alcohol (ref ≥ 5 days/week)</b>         | 0.96;0.70-1.32                   |
| <b>BMI</b>                                 | 1.09;1.06-1.11***                |
| <b>Hypertension case (ref: no)</b>         | 1.36;1.05-1.75*                  |
| <b>CVD case (ref: no)</b>                  | 0.98;0.70-1.38                   |
| <b>HbA<sub>1c</sub></b>                    | 14.41;9.74-21.33***              |
| <b>Depression (range 0-7)</b>              | 1.05; 0.97-1.13                  |

BMI= Body mass index; CI= Confidence Interval; CVD= Cardiovascular disease;

**HbA<sub>1c</sub>** = Glycated haemoglobin; HR= Hazard Ratio; Ref = reference category

\* $p < 0.05$  \*\* $p < 0.01$  \*\*\* $p < 0.001$
